# Supplementary material
Source: Springer Nature journal article supplement (https://www.springermedizin.de/resource/supplementary/12872_2014_703_MOESM4_ESM.pdf/9430684)
Supplement: MOESM4 [file 9430684]

# Severe Aortic Stenosis

High-risk SAVR candidates

TAVI candidates

Access Route

Transfemoral

Transaortic

Transapical
